# Supplementary material for: Water mites (Acari, Hydrachnidia) of riparian springs in a small lowland river valley: what are the key factors for species distribution?
Source: PeerJ. 2018 May 24;6:e4797. doi: 10.7717/peerj.4797 (PMC5971099; doi:10.7717/peerj.4797)
Supplement: Supplemental Information 1 — Database—source data. [file peerj-06-4797-s001.xlsx]

## Sheet: springs data
																																							buffer zones (general characteristics)
																																							Surface area			Spatial character of layers in landscape			Character of layers' edges			Shape of layers in landscape
																											sludge fractions (%)								organic substrate	mineral substrates	Granulometry
Species	Geographical area	Locality	Site	Data	month	Males	Females	Duutonyphs	Total imagines	Total	type of waters	type of spring	Oxygen	pH	temperature	cond.	NH4 A	NO3 A	PO3 A	Fe A	Turnidity	Hardness	BZT5	floow of waters m/s	illumination	degree of overgrowth	4mm	3,15mm	2,5mm	0,4mm	0,3mm	0,1mm	0,056mm	<0,056mm	[%]	[%]	M	W	TA	MPS	PSSD	MEDPS	NUMP	PD	TE	MTE	ED	SUM	MSI
Hydryphantes ruber (de Geer)	River Krąpiel	Z/1	Z/1/2	19.05.10	May	2	5		7	7	spring	limnocrene	2.9	7.04	10.5	173.4	0.3	9.5	0.2	0.1	44.8	61	0.5	0	19.2674	2	7.79102	3.66636	2.92545	16.2695	4.76627	39.6502	16.5826	8.34861	9.99146	90.0085	2.05333	2.0003	78.54	1.428	2.76	0.52	55	70.028	37176	676	473.338	107.1	1.95
Hydryphantes tenuipalpis Thon	River Krąpiel	Z/1	Z/1/2	19.05.10	May	1			1	1	spring	limnocrene	2.9	7.04	10.5	173.4	0.3	9.5	0.2	0.1	44.8	61	0.5	0	19.2674	2	7.79102	3.66636	2.92545	16.2695	4.76627	39.6502	16.5826	8.34861	9.99146	90.0085	2.05333	2.0003	78.54	1.428	2.76	0.52	55	70.028	37176	676	473.338	107.1	1.95
Hydryphantes tenuipalpis Thon	River Krąpiel	Z/2	Z/2/3	19.05.10	May		1		1	1	spring	helocrene	7.3	7.1	10.7	140.9	0.2	0.5	0.5	0.15	60	58	4.8	0	31.4552	1	5.17957	2.51649	2.68752	40.4838	7.25629	27.1928	5.03298	9.65062	43.4213	56.5787	1.98667	1.51818	78.49	3.42	4.94	1.25	23	29.3031	28969	1260	369.079	60.33	2.62
Thyopsis cancellata Piersig	River Krąpiel	Z/4	Z/4/1	03.09.10	September		1		1	1	spring	helocrene	2.5	6.6	10.1	183.2	0.357	0.42	0.21	0.3	21.8	137	1	0	0.186047	1	2.32054	1.60891	2.35149	51.2067	5.01238	30.0124	2.9703	4.51733	63.3107	36.6893	1.98667	1.38182	78.49	3.92	7.77	1.06	20	25.481	19413	971	247.331	39.51	1.98
Parathyas sp. Koch, Lundblad	River Krąpiel	Z/4	Z/4/2	03.09.10	September			1	0	1	spring	helocrene	2.1	6.79	11	187.3	0.283	0.43	0.083	0.4	13.7	110	1.3	0	3.31395	5	0	0	0.436962	30.3817	5.98895	44.7372	8.8035	9.65172	20.3392	79.6608	2.93333	1.27667	78.49	3.92	7.77	1.06	20	25.481	19413	971	247.331	39.51	1.98
Parathyas sp. Koch, Lundblad	River Krąpiel	Z/1	Z/1/2	19.05.10	May			9	0	9	spring	limnocrene	2.9	7.04	10.5	173.4	0.3	9.5	0.2	0.1	44.8	61	0.5	0	19.2674	2	7.79102	3.66636	2.92545	16.2695	4.76627	39.6502	16.5826	8.34861	9.99146	90.0085	2.05333	2.0003	78.54	1.428	2.76	0.52	55	70.028	37176	676	473.338	107.1	1.95
Parathyas sp. Koch, Lundblad	River Krąpiel	Z/4	Z/4/2	20.05.10	May			3	0	3	spring	helocrene	0.3	7.11	18.3	211	0.264	9.55	0.093	0.02	11.35	263	0.3	0	31.8333	3	2.796	0.96879	0.815501	5.85566	2.15219	60.8682	16.494	10.0497	0.859771	99.1402	3.07333	1.57167	78.49	3.92	7.77	1.06	20	25.481	19413	971	247.331	39.51	1.98
Parathyas sp. Koch, Lundblad	River Krąpiel	Z/6	Z/6/3	03.09.10	September			1	0	1	spring	limnocrene	10.8	7.89	12.8	226	0.05	0.1	1.675	2.9	44.3	113	9.7	0	43.4783	0	3.48754	1.89798	2.3962	49.9881	5.07711	25.9549	5.21945	5.97865	12.4312	87.5688	1.98667	1.38182	78.54	2.12	5.17	0.59	37	47.1098	25894	700	329.692	70.01	1.89
Parathyas sp. Koch, Lundblad	River Krąpiel	Z/5	Z/5/5	20.05.10	May			1	0	1	spring	limnocrene	2.4	6.6	15.4	217	0.19	0.1	0.022	0.03	0	268	1.9	0	72.6923	2	11.4314	4.99506	5.86377	47.7196	4.83712	17.6111	4.18559	3.35637	39.1009	60.8991	0.993333	1.8753	78.49	7.85	10.99	1.53	10	12.7405	15089	1509	192.241	20.44	2.04
Parathyas sp. Koch, Lundblad	River Krąpiel	Z/6	Z/6/2	05.11.10	November			1	0	1	spring	helocrene	5.7	6.55	10.5	176.4	0.117	1.27	0.023	0.618	16.5	189	2.2	0	21.7391	0	0	0	0.516304	42.5272	4.75543	33.288	8.09783	10.8152	35.5072	64.4928	2.12667	0.930303	78.54	2.12	5.17	0.59	37	47.1098	25894	700	329.692	70.01	1.89
Parathyas barbigera Viets	River Krąpiel	Z/1	Z/1/2	19.05.10	May		1		1	1	spring	limnocrene	2.9	7.04	10.5	173.4	0.3	9.5	0.2	0.1	44.8	61	0.5	0	19.2674	2	7.79102	3.66636	2.92545	16.2695	4.76627	39.6502	16.5826	8.34861	9.99146	90.0085	2.05333	2.0003	78.54	1.428	2.76	0.52	55	70.028	37176	676	473.338	107.1	1.95
Parathyas bruzelii Lundblad	River Krąpiel	Z/1	Z/1/2	19.05.10	May	2			2	2	spring	limnocrene	2.9	7.04	10.5	173.4	0.3	9.5	0.2	0.1	44.8	61	0.5	0	19.2674	2	7.79102	3.66636	2.92545	16.2695	4.76627	39.6502	16.5826	8.34861	9.99146	90.0085	2.05333	2.0003	78.54	1.428	2.76	0.52	55	70.028	37176	676	473.338	107.1	1.95
Parathyas dirempta Koenike	River Krąpiel	Z/1	Z/1/2	19.05.10	May	1	2		3	3	spring	limnocrene	2.9	7.04	10.5	173.4	0.3	9.5	0.2	0.1	44.8	61	0.5	0	19.2674	2	7.79102	3.66636	2.92545	16.2695	4.76627	39.6502	16.5826	8.34861	9.99146	90.0085	2.05333	2.0003	78.54	1.428	2.76	0.52	55	70.028	37176	676	473.338	107.1	1.95
Parathyas pachystoma Koenike	River Krąpiel	Z/2	Z/2/2	02.09.10	September		1		1	1	spring	helocrene	5.5	6.01	9.8	164.9	0.369	0.67	0.242	0.03	13.3	144	3.6	0	5.71795	2	0.840689	0.462379	0.882724	30.3069	8.44893	49.4746	4.96007	4.62379	66.3492	33.6508	2.65333	1.3303	78.49	3.42	4.94	1.25	23	29.3031	28969	1260	369.079	60.33	2.62
Parathyas pachystoma Koenike	River Krąpiel	Z/2	Z/2/2	12.07.10	July	3			3	3	spring	helocrene	2.6	6.62	18.6	170	0.852	1.45	0.498	0.02	21	202	2.1	0	4.92063	2	0.840689	0.462379	0.882724	30.3069	8.44893	49.4746	4.96007	4.62379	66.3492	33.6508	2.65333	1.3303	78.49	3.42	4.94	1.25	23	29.3031	28969	1260	369.079	60.33	2.62
Parathyas pachystoma Koenike	River Krąpiel	Z/1	Z/1/2	02.09.10	September		2		2	2	spring	limnocrene	1.7	8.24	11.7	175.1	0.594	3.01	0.499	0.9	5.1	131	1.2	0	7.30769	4	4.75753	1.12618	1.17214	39.3932	5.35509	33.5095	6.45829	8.22799	20.9092	79.0908	2.12667	1.51818	78.54	1.428	2.76	0.52	55	70.028	37176	676	473.338	107.1	1.95
Parathyas pachystoma Koenike	River Krąpiel	Z/3	Z/3/2	20.05.10	May		1		1	1	spring	helocrene	5.8	7.8	12.7	147	0.167	7.03	0.01	0.21	6.6	228	2.2	0.001	39.6622	1	2.28022	1.37363	1.66209	32.4313	6.07143	45.1099	7.11538	3.95604	15.8938	84.1062	2.65333	1.38182	78.49	4.91	7.34	0.61	22	28.029	18905	1182	240.859	32.45	2.03
Parathyas pachystoma Koenike	River Krąpiel	Z/1	Z/1/1	19.05.10	May	1			1	1	spring	limnocrene	2.9	7.04	10.5	173.4	0.3	9.5	0.2	0.1	44.8	61	0.5	0	23.8095	0	7.79102	3.66636	2.92545	16.2695	4.76627	39.6502	16.5826	8.34861	9.99146	90.0085	2.05333	2.0003	78.54	1.428	2.76	0.52	55	70.028	37176	676	473.338	107.1	1.95
Parathyas pachystoma Koenike	River Krąpiel	Z/1	Z/1/2	04.11.10	November		2		2	2	spring	limnocrene	2.6	7.76	13.5	199	0.361	1.44	0.368	0.4	44	174	1.3	0	11.6667	4	4.75753	1.12618	1.17214	39.3932	5.35509	33.5095	6.45829	8.22799	20.9092	79.0908	2.12667	1.51818	78.54	1.428	2.76	0.52	55	70.028	37176	676	473.338	107.1	1.95
Parathyas pachystoma Koenike	River Krąpiel	Z/2	Z/2/3	19.05.10	May	2	2		4	4	spring	helocrene	7.3	7.1	10.7	140.9	0.2	0.5	0.5	0.15	60	58	4.8	0	31.4552	1	5.17957	2.51649	2.68752	40.4838	7.25629	27.1928	5.03298	9.65062	43.4213	56.5787	1.98667	1.51818	78.49	3.42	4.94	1.25	23	29.3031	28969	1260	369.079	60.33	2.62
Parathyas pachystoma Koenike	River Krąpiel	Z/1	Z/1/2	19.05.10	May	22	12		34	34	spring	limnocrene	2.9	7.04	10.5	173.4	0.3	9.5	0.2	0.1	44.8	61	0.5	0	19.2674	2	7.79102	3.66636	2.92545	16.2695	4.76627	39.6502	16.5826	8.34861	9.99146	90.0085	2.05333	2.0003	78.54	1.428	2.76	0.52	55	70.028	37176	676	473.338	107.1	1.95
Parathyas pachystoma Koenike	River Krąpiel	Z/4	Z/4/1	05.11.10	November	3			3	3	spring	helocrene	3.7	6.7	8.9	199	0.187	0.1	0.077	0.259	7.6	196	1.6	0	0.581395	1	3.17506	2.1167	2.28833	49.5137	5.29176	18.8215	7.12243	11.6705	57.3726	42.6274	2.26667	1.72818	78.49	3.92	7.77	1.06	20	25.481	19413	971	247.331	39.51	1.98
Parathyas pachystoma Koenike	River Krąpiel	Z/2	Z/2/2	19.05.10	May	5			5	5	spring	helocrene	1.6	7.1	7.8	162.6	0.3	1.5	0.1	0.06	43.2	126	0.9	0.0021	17.3134	1	0	2.79664	2.39712	50.3396	6.71195	26.8478	7.11147	3.79545	77.0336	22.9664	1.98667	1.3303	78.49	3.42	4.94	1.25	23	29.3031	28969	1260	369.079	60.33	2.62
Parathyas pachystoma Koenike	River Krąpiel	Z/1	Z/1/3	17.05.10	May	1			1	1	spring	helocrene	2.9	7.04	10.5	173.4	0.3	9.5	0.2	0.1	44.8	61	0.5	0.0057	12.3077	4	7.79102	3.66636	2.92545	16.2695	4.76627	39.6502	16.5826	8.34861	9.99146	90.0085	2.05333	2.0003	78.54	1.428	2.76	0.52	55	70.028	37176	676	473.338	107.1	1.95
Parathyas pachystoma Koenike	River Krąpiel	Z/6	Z/6/4	13.07.10	July	1	1		2	2	spring	limnocrene	0.4	7.6	24	245	1.632	0.58	0.661	1.45	102	211	4.4	0	47.8	5	11.4314	4.99506	5.86377	47.7196	4.83712	17.6111	4.18559	3.35637	39.1009	60.8991	0.993333	1.8753	78.54	2.12	5.17	0.59	37	47.1098	25894	700	329.692	70.01	1.89
Parathyas pachystoma Koenike	River Krąpiel	Z/4	Z/4/1	20.05.10	May		1		1	1	spring	helocrene	5	6.48	15.6	197.2	0.139	23.43	0.091	0.03	12	75	2.5	0	18.3333	1	6.91735	2.48315	3.26357	50.1064	6.15466	23.182	3.68925	4.20362	30.4122	69.5878	1.10667	1.7903	78.49	3.92	7.77	1.06	20	25.481	19413	971	247.331	39.51	1.98
Parathyas pachystoma Koenike	River Krąpiel	Z/6	Z/6/4	20.05.10	May	4	2		6	6	spring	limnocrene	2.6	6.91	12.8	207	0.412	0.23	1.161	1.2	115.3	313	0.7	0	24.7949	2	1.11175	0.938043	0.787493	12.3914	3.34684	57.6144	18.6682	5.14186	9.44405	90.556	2.93333	1.5403	78.54	2.12	5.17	0.59	37	47.1098	25894	700	329.692	70.01	1.89
Parathyas palustris Koenike	River Krąpiel	Z/2	Z/2/2	04.11.10	November		1		1	1	spring	helocrene	7.8	5.4	9.9	193	0.173	1.04	0.16	0.109	0	62	3	0	10.2564	2	4.1118	0.919108	0.79011	22.2198	12.6095	54.3617	3.40231	1.5856	31.2252	68.7748	2.65333	1.25455	78.49	3.42	4.94	1.25	23	29.3031	28969	1260	369.079	60.33	2.62
Parathyas palustris Koenike	River Krąpiel	Z/4	Z/4/1	03.09.10	September	1	1		2	2	spring	helocrene	2.5	6.6	10.1	183.2	0.357	0.42	0.21	0.3	21.8	137	1	0	0.186047	1	2.32054	1.60891	2.35149	51.2067	5.01238	30.0124	2.9703	4.51733	63.3107	36.6893	1.98667	1.38182	78.49	3.92	7.77	1.06	20	25.481	19413	971	247.331	39.51	1.98
Parathyas palustris Koenike	River Krąpiel	Z/6	Z/6/2	05.11.10	November		1		1	1	spring	helocrene	5.7	6.55	10.5	176.4	0.117	1.27	0.023	0.618	16.5	189	2.2	0	21.7391	0	0	0	0.516304	42.5272	4.75543	33.288	8.09783	10.8152	35.5072	64.4928	2.12667	0.930303	78.54	2.12	5.17	0.59	37	47.1098	25894	700	329.692	70.01	1.89
Parathyas palustris Koenike	River Krąpiel	Z/1	Z/1/2	04.11.10	November	1			1	1	spring	limnocrene	2.6	7.76	13.5	199	0.361	1.44	0.368	0.4	44	174	1.3	0	11.6667	4	4.75753	1.12618	1.17214	39.3932	5.35509	33.5095	6.45829	8.22799	20.9092	79.0908	2.12667	1.51818	78.54	1.428	2.76	0.52	55	70.028	37176	676	473.338	107.1	1.95
Parathyas palustris Koenike	River Krąpiel	Z/2	Z/2/2	19.05.10	May	1			1	1	spring	helocrene	1.6	7.1	7.8	162.6	0.3	1.5	0.1	0.06	43.2	126	0.9	0.0021	17.3134	1	0	2.79664	2.39712	50.3396	6.71195	26.8478	7.11147	3.79545	77.0336	22.9664	1.98667	1.3303	78.49	3.42	4.94	1.25	23	29.3031	28969	1260	369.079	60.33	2.62
Lebertia separata	River Krąpiel	Z/3	Z/3/2	20.05.10	May	1			1	1	spring	helocrene	5.8	7.8	12.7	147	0.167	7.03	0.01	0.21	6.6	228	2.2	0.001	39.6622	1	2.28022	1.37363	1.66209	32.4313	6.07143	45.1099	7.11538	3.95604	15.8938	84.1062	2.65333	1.38182	78.49	4.91	7.34	0.61	22	28.029	18905	1182	240.859	32.45	2.03
Lebertia maglioi	River Krąpiel	Z/3	Z/3/2	20.05.10	May	1			1	1	spring	helocrene	5.8	7.8	12.7	147	0.167	7.03	0.01	0.21	6.6	228	2.2	0.001	39.6622	1	2.28022	1.37363	1.66209	32.4313	6.07143	45.1099	7.11538	3.95604	15.8938	84.1062	2.65333	1.38182	78.49	4.91	7.34	0.61	22	28.029	18905	1182	240.859	32.45	2.03
Parathyas palustris Koenike	River Krąpiel	Z/3	Z/3/2	20.05.10	May	1			1	1	spring	helocrene	5.8	7.8	12.7	147	0.167	7.03	0.01	0.21	6.6	228	2.2	0.001	39.6622	1	2.28022	1.37363	1.66209	32.4313	6.07143	45.1099	7.11538	3.95604	15.8938	84.1062	2.65333	1.38182	78.49	4.91	7.34	0.61	22	28.029	18905	1182	240.859	32.45	2.03
Parathyas palustris Koenike	River Krąpiel	Z/2	Z/2/3	19.05.10	May		1		1	1	spring	helocrene	7.3	7.1	10.7	140.9	0.2	0.5	0.5	0.15	60	58	4.8	0	31.4552	1	5.17957	2.51649	2.68752	40.4838	7.25629	27.1928	5.03298	9.65062	43.4213	56.5787	1.98667	1.51818	78.49	3.42	4.94	1.25	23	29.3031	28969	1260	369.079	60.33	2.62
Parathyas palustris Koenike	River Krąpiel	Z/1	Z/1/2	19.05.10	May	2	3		5	5	spring	limnocrene	2.9	7.04	10.5	173.4	0.3	9.5	0.2	0.1	44.8	61	0.5	0	19.2674	2	7.79102	3.66636	2.92545	16.2695	4.76627	39.6502	16.5826	8.34861	9.99146	90.0085	2.05333	2.0003	78.54	1.428	2.76	0.52	55	70.028	37176	676	473.338	107.1	1.95
Parathyas palustris Koenike	River Krąpiel	Z/2	Z/2/2	19.05.10	May	1	1		2	2	spring	helocrene	1.6	7.1	7.8	162.6	0.3	1.5	0.1	0.06	43.2	126	0.9	0.0021	17.3134	1	0	2.79664	2.39712	50.3396	6.71195	26.8478	7.11147	3.79545	77.0336	22.9664	1.98667	1.3303	78.49	3.42	4.94	1.25	23	29.3031	28969	1260	369.079	60.33	2.62
Parathyas palustris Koenike	River Krąpiel	Z/3	Z/3/5	12.07.10	July		1		1	1	spring	helocrene		2.6	6.2	26.7	227	0.575	1.39	0.266	0.068	35.3	159	1.9	0	0.361538	0	2.91312	1.21471	1.39949	54.1074	11.9188	21.5631	5.32351	1.55982	3.06353	96.9365	1.98667	1.3303	78.49	4.91	7.34	0.61	22	28.029	18905	1182	240.859	32.45
Euthyas truncata (Neuman)	River Krąpiel	Z/4	Z/4/2	05.11.10	November		2		2	2	spring	helocrene	3.7	6.7	8.9	199	0.183	0.97	0.01	0.406	9	196	1.6	0	7.75194	5	0	0	0.436962	30.3817	5.98895	44.7372	8.8035	9.65172	20.3392	79.6608	2.93333	1.27667	78.49	3.92	7.77	1.06	20	25.481	19413	971	247.331	39.51	1.98
Arrenurus cylindratusPiersig	River Krąpiel	Z/4	Z/4/2	20.05.10	May		1		1	1	spring	helocrene	0.3	7.11	18.3	211	0.264	9.55	0.093	0.02	11.35	263	0.3	0	31.8333	3	2.796	0.96879	0.815501	5.85566	2.15219	60.8682	16.494	10.0497	0.859771	99.1402	3.07333	1.57167	78.49	3.92	7.77	1.06	20	25.481	19413	971	247.331	39.51	1.98
Sperchon squamosus Kramer	River Krąpiel	Z/2	Z/2/1	02.09.10	September	7	12		19	19	spring	reocrene	5.6	5.2	10.8	166	0.285	0.61	0.156	0.03	0	112	3.6	0.2743	5.70513	0	0	0	0.811085	36.5664	11.4566	40.6218	5.57621	4.96789	35.474	64.526	2.12667	0.930303	78.49	3.42	4.94	1.25	23	29.3031	28969	1260	369.079	60.33	2.62
Lebertia sparsicapillata Thor	River Krąpiel	Z/2	Z/2/1	24.07.10	July	1			1	1	spring	reocrene	4.5	6.96	20.5	171.5	0.724	1.26	0.299	0.02	14.06	298	2.3	0.0084	4.92063	0	0	0	0.811085	36.5664	11.4566	40.6218	5.57621	4.96789	35.474	64.526	2.12667	0.930303	78.49	3.42	4.94	1.25	23	29.3031	28969	1260	369.079	60.33	2.62
Piona nodata (O.F. Müller)	River Krąpiel	Z/1	Z/1/1	19.05.10	May		1		1	1	spring	limnocrene	2.9	7.04	10.5	173.4	0.3	9.5	0.2	0.1	44.8	61	0.5	0	23.8095	0	7.79102	3.66636	2.92545	16.2695	4.76627	39.6502	16.5826	8.34861	9.99146	90.0085	2.05333	2.0003	78.54	1.428	2.76	0.52	55	70.028	37176	676	473.338	107.1	1.95
Tiphys latipes (O.F. Müller)	River Krąpiel	Z/1	Z/1/1	19.05.10	May	1			1	1	spring	limnocrene	2.9	7.04	10.5	173.4	0.3	9.5	0.2	0.1	44.8	61	0.5	0	23.8095	0	7.79102	3.66636	2.92545	16.2695	4.76627	39.6502	16.5826	8.34861	9.99146	90.0085	2.05333	2.0003	78.54	1.428	2.76	0.52	55	70.028	37176	676	473.338	107.1	1.95
Tiphys latipes (O.F. Müller)	River Krąpiel	Z/6	Z/6/3	21.05.10	May	1			1	1	spring	limnocrene	5	5.25	14	233	0.144	0.1	2.431	2.6	376	147	4.8	0	24.7949	0	1.11175	0.938043	0.787493	12.3914	3.34684	57.6144	18.6682	5.14186	9.44405	90.556	2.93333	1.5403	78.54	2.12	5.17	0.59	37	47.1098	25894	700	329.692	70.01	1.89
Arrenurus conicus Piersig	River Krąpiel	Z/6	Z/6/3	21.05.10	May	1			1	1	spring	limnocrene	5	5.25	14	233	0.144	0.1	2.431	2.6	376	147	4.8	0	24.7949	0	1.11175	0.938043	0.787493	12.3914	3.34684	57.6144	18.6682	5.14186	9.44405	90.556	2.93333	1.5403	78.54	2.12	5.17	0.59	37	47.1098	25894	700	329.692	70.01	1.89
Arrenurus conicus Piersig	River Krąpiel	Z/6	Z/6/4	20.05.10	May	1			1	1	spring	limnocrene	2.6	6.91	12.8	207	0.412	0.23	1.161	1.2	115.3	313	0.7	0	24.7949	2	1.11175	0.938043	0.787493	12.3914	3.34684	57.6144	18.6682	5.14186	9.44405	90.556	2.93333	1.5403	78.54	2.12	5.17	0.59	37	47.1098	25894	700	329.692	70.01	1.89
Lebertia oblonga Koenike	River Krąpiel	Z/6	Z/6/3	05.11.10	November		1		1	1	spring	limnocrene	6.7	6.55	10.5	176.4	0.19	0.26	1.751	6.5	95	189	2.2	0	21.7391	0	0	0.162933	0.315682	12.0265	2.89206	76.5377	3.92057	4.1446	14.7633	85.2367	2.40667	1.27667	78.54	2.12	5.17	0.59	37	47.1098	25894	700	329.692	70.01	1.89
Parathyas sp. Koch, Lundblad	River Krąpiel	Z/6	Z/6/2	05.11.10	November			1	0	1	spring	helocrene	5.7	6.55	10.5	176.4	0.117	1.27	0.023	0.618	16.5	189	2.2	0	21.7391	0	0	0	0.516304	42.5272	4.75543	33.288	8.09783	10.8152	35.5072	64.4928	2.12667	0.930303	78.54	2.12	5.17	0.59	37	47.1098	25894	700	329.692	70.01	1.89
Arrenurus integrator (O.F. Müller)	River Krąpiel	Z/6	Z/6/4	13.07.10	July		1		1	1	spring	limnocrene	0.4	7.6	24	245	1.632	0.58	0.661	1.45	102	211	4.4	0	47.8	5	11.4314	4.99506	5.86377	47.7196	4.83712	17.6111	4.18559	3.35637	39.1009	60.8991	0.993333	1.8753	78.54	2.12	5.17	0.59	37	47.1098	25894	700	329.692	70.01	1.89
Arrenurus mediorotundatus Thor	River Krąpiel	Z/4	Z/4/2	20.05.10	May		2		2	2	spring	helocrene	0.3	7.11	18.3	211	0.264	9.55	0.093	0.02	11.35	263	0.3	0	31.8333	3	2.796	0.96879	0.815501	5.85566	2.15219	60.8682	16.494	10.0497	0.859771	99.1402	3.07333	1.57167	78.49	3.92	7.77	1.06	20	25.481	19413	971	247.331	39.51	1.98
Sperchon squamosus Kramer	River Krąpiel	Z/2	Z/2/1	12.07.10	July		1		1	1	spring	reocrene	4.5	6.96	20.5	171.5	0.724	1.26	0.299	0.02	14.06	298	2.3	0.0084	4.92063	0	0	0	0.811085	36.5664	11.4566	40.6218	5.57621	4.96789	35.474	64.526	2.12667	0.930303	78.49	3.42	4.94	1.25	23	29.3031	28969	1260	369.079	60.33	2.62
Lebertia salebrosa Koenike	River Krąpiel	Z/2	Z/2/1	12.07.10	July		1		1	1	spring	reocrene	4.5	6.96	20.5	171.5	0.724	1.26	0.299	0.02	14.06	298	2.3	0.0084	4.92063	0	0	0	0.811085	36.5664	11.4566	40.6218	5.57621	4.96789	35.474	64.526	2.12667	0.930303	78.49	3.42	4.94	1.25	23	29.3031	28969	1260	369.079	60.33	2.62
Lebertia sinuata Viets	River Krąpiel	Z/2	Z/2/1	12.07.10	July	2			2	2	spring	reocrene	4.5	6.96	20.5	171.5	0.724	1.26	0.299	0.02	14.06	298	2.3	0.0084	4.92063	0	0	0	0.811085	36.5664	11.4566	40.6218	5.57621	4.96789	35.474	64.526	2.12667	0.930303	78.49	3.42	4.94	1.25	23	29.3031	28969	1260	369.079	60.33	2.62
Bandakia concreta Thor	River Krąpiel	Z/2	Z/2/4	05.11.10	November	1			1	1	spring	helocrene	7.8	5.4	9.9	193	0.137	1.14	0.235	0.106	0	157	3	0	9.48718	2	0.627075	0.848395	1.06972	38.9524	10.0332	38.9893	6.27075	3.20915	3.05924	96.9408	2.12667	1.3303	78.49	3.42	4.94	1.25	23	29.3031	28969	1260	369.079	60.33	2.62
Tiphys sp. Koch	River Krąpiel	Z/6	Z/6/2	03.09.10	September			1	0	1	spring	helocrene	3.1	7.89	11.4	198.6	0.735	0.655	0.199	0.7	0	119	2.2	0	10	0	1.71611	0.710575	0.670354	15.207	8.25876	63.8445	7.04877	2.54399	0.824295	99.1757	2.65333	1.3303	78.54	2.12	5.17	0.59	37	47.1098	25894	700	329.692	70.01	1.89
Atractides nodipalpis (Thor)	River Krąpiel	Z/6	Z/6/2	03.09.10	September		1		1	1	spring	helocrene	3.1	7.89	11.4	198.6	0.735	0.655	0.199	0.7	0	119	2.2	0	10	0	1.71611	0.710575	0.670354	15.207	8.25876	63.8445	7.04877	2.54399	0.824295	99.1757	2.65333	1.3303	78.54	2.12	5.17	0.59	37	47.1098	25894	700	329.692	70.01	1.89
Lebertia sinuata Viets	River Krąpiel	Z/2	Z/2/1	02.09.10	September	1	1		2	2	spring	reocrene	5.6	5.2	10.8	166	0.285	0.61	0.156	0.03	0	112	3.6	0.2743	5.70513	0	0	0	0.811085	36.5664	11.4566	40.6218	5.57621	4.96789	35.474	64.526	2.12667	0.930303	78.49	3.42	4.94	1.25	23	29.3031	28969	1260	369.079	60.33	2.62
Sperchon squamosus Kramer	River Krąpiel	Z/2	Z/2/1	04.11.10	November	1	2		3	3	spring	reocrene	7.8	5.4	9.9	193	0.374	1.41	0.085	0.115	0	151	3	0.0676	10	0	0	0	0.603358	34.3914	10.8342	46.17	3.14795	4.8531	1.62832	98.3717	2.65333	0.930303	78.49	3.42	4.94	1.25	23	29.3031	28969	1260	369.079	60.33	2.62
Rutripalpus limicola Sokolow	River Krąpiel	Z/2	Z/2/4	02.09.10	September		1		1	1	spring	helocrene	4.6	6.18	12.5	169	0.331	1.04	0.777	0.02	7.7	124	4.3	0	5.84615	2	2.60567	1.15808	2.02664	46.6126	4.89288	30.7759	5.64563	6.28257	78.8813	21.1187	1.98667	1.38182	78.49	3.42	4.94	1.25	23	29.3031	28969	1260	369.079	60.33	2.62
Arrenurus mediorotundatus Thor	River Krąpiel	Z/2	Z/2/4	02.09.10	September		5		5	5	spring	helocrene	4.6	6.18	12.5	169	0.331	1.04	0.777	0.02	7.7	124	4.3	0	5.84615	2	2.60567	1.15808	2.02664	46.6126	4.89288	30.7759	5.64563	6.28257	78.8813	21.1187	1.98667	1.38182	78.49	3.42	4.94	1.25	23	29.3031	28969	1260	369.079	60.33	2.62
Arrenurus pugionifer Koenike	River Krąpiel	Z/1	Z/1/2	02.09.10	September	1			1	1	spring	limnocrene	1.7	8.24	11.7	175.1	0.594	3.01	0.499	0.9	5.1	131	1.2	0	7.30769	4	4.75753	1.12618	1.17214	39.3932	5.35509	33.5095	6.45829	8.22799	20.9092	79.0908	2.12667	1.51818	78.54	1.428	2.76	0.52	55	70.028	37176	676	473.338	107.1	1.95
Arrenurus mediorotundatus Thor	River Krąpiel	Z/6	Z/6/2	21.05.10	May		1		1	1	spring	helocrene	4.2	6.54	12.7	221	0.286	5.02	0.037	0.08	6.6	433	2	0	24.7949	0	11.4314	4.99506	5.86377	47.7196	4.83712	17.6111	4.18559	3.35637	39.1009	60.8991	0.993333	1.8753	78.54	2.12	5.17	0.59	37	47.1098	25894	700	329.692	70.01	1.89
Lebertia glabra Thor	River Krąpiel	Z/5	Z/5/1	20.05.10	May		1		1	1	spring	reocrene	8.5	7.67	18.6	288	0.1	60	0.01	0.02	44.8	231	2.9	0.0004	42.4561	0	24.9244	2.15266	2.09448	22.4226	5.14312	31.8013	6.36491	5.09658	6.70459	93.2954	1.54667	1.4603	78.49	7.85	10.99	1.53	10	12.7405	15089	1509	192.241	20.44	2.04
Arrenurus fimbriatus Koenike	River Krąpiel	Z/3	Z/3/3	04.11.10	November		1		1	1	spring	reocrene		5.7	5.3	13.4	211	0.079	8.82	0.01	0.05	17.2	151	5	0.0027	36.8421	0	7.70845	3.84486	4.03598	55.4769	9.82574	18.0026	0.805696	0.299794	12.2043	87.7957	1.10667	1.66303	78.49	4.91	7.34	0.61	22	28.029	18905	1182	240.859	32.45
Sperchon thienemanni Koenike	River Krąpiel	Z/5	Z/5/2	03.09.10	September	1	2		3	3	spring	helocrene	8.2	7.9	11.8	189.1	0.238	26.3	0.015	0.03	0	151	2.2	0.1065	8.23958	0	32.4432	5.99756	5.0756	29.0372	4.43547	20.9282	0.764325	1.31846	1.35455	98.6454	1.54667	1.33303	78.49	7.85	10.99	1.53	10	12.7405	15089	1509	192.241	20.44	2.04
Lebertia glabra Thor	River Krąpiel	Z/5	Z/5/2	03.09.10	September		1		1	1	spring	helocrene	8.2	7.9	11.8	189.1	0.238	26.3	0.015	0.03	0	151	2.2	0.1065	8.23958	0	32.4432	5.99756	5.0756	29.0372	4.43547	20.9282	0.764325	1.31846	1.35455	98.6454	1.54667	1.33303	78.49	7.85	10.99	1.53	10	12.7405	15089	1509	192.241	20.44	2.04
Sperchon squamosus Kramer	River Krąpiel	Z/2	Z/2/2	12.07.10	July	1			1	1	spring	helocrene	2.6	6.62	18.6	170	0.852	1.45	0.498	0.02	21	202	2.1	0	4.92063	2	0.840689	0.462379	0.882724	30.3069	8.44893	49.4746	4.96007	4.62379	66.3492	33.6508	2.65333	1.3303	78.49	3.42	4.94	1.25	23	29.3031	28969	1260	369.079	60.33	2.62
Arrenurus mediorotundatus Thor	River Krąpiel	Z/2	Z/2/2	12.07.10	July		1		1	1	spring	helocrene	2.6	6.62	18.6	170	0.852	1.45	0.498	0.02	21	202	2.1	0	4.92063	2	0.840689	0.462379	0.882724	30.3069	8.44893	49.4746	4.96007	4.62379	66.3492	33.6508	2.65333	1.3303	78.49	3.42	4.94	1.25	23	29.3031	28969	1260	369.079	60.33	2.62
Arrenurus fimbriatus Koenike	River Krąpiel	Z/2	Z/2/2	12.07.10	July		1		1	1	spring	helocrene	2.6	6.62	18.6	170	0.852	1.45	0.498	0.02	21	202	2.1	0	4.92063	2	0.840689	0.462379	0.882724	30.3069	8.44893	49.4746	4.96007	4.62379	66.3492	33.6508	2.65333	1.3303	78.49	3.42	4.94	1.25	23	29.3031	28969	1260	369.079	60.33	2.62
Tiphys scaurellus Tuzovskij	River Krąpiel	Z/2	Z/2/2	12.07.10	July		1		1	1	spring	helocrene	2.6	6.62	18.6	170	0.852	1.45	0.498	0.02	21	202	2.1	0	4.92063	2	0.840689	0.462379	0.882724	30.3069	8.44893	49.4746	4.96007	4.62379	66.3492	33.6508	2.65333	1.3303	78.49	3.42	4.94	1.25	23	29.3031	28969	1260	369.079	60.33	2.62
Lebertia salebrosa Koenike	River Krąpiel	Z/5	Z/5/4	20.05.10	May		1		1	1	spring	helocrene	8.5	7.89	13.6	165	1.45	39.7	0.01	0.02	2.5	422	3.5	0.1783	1.41404	0	12.6018	3.13568	3.37624	26.8917	9.45769	38.2444	3.54927	2.74319	1.33908	98.6609	1.13333	1.8753	78.49	7.85	10.99	1.53	10	12.7405	15089	1509	192.241	20.44	2.04
Lebertia salebrosa Koenike	River Krąpiel	Z/5	Z/5/1	13.07.10	July	2	3		5	5	spring	reocrene	7.9	6.92	10.9	374	0.402	24.51	0.026	0.02	1.9	402	4.7	0.0005	1.77802	0	18.6102	2.78582	2.29008	20.7072	6.41836	37.2686	5.95332	5.96648	4.00779	95.9922	1.68667	1.4603	78.49	7.85	10.99	1.53	10	12.7405	15089	1509	192.241	20.44	2.04
Arrenurus mediorotundatus Thor	River Krąpiel	Z/4	Z/4/1	03.09.10	September		2		2	2	spring	helocrene	2.5	6.6	10.1	183.2	0.357	0.42	0.21	0.3	21.8	137	1	0	0.186047	1	2.32054	1.60891	2.35149	51.2067	5.01238	30.0124	2.9703	4.51733	63.3107	36.6893	1.98667	1.38182	78.49	3.92	7.77	1.06	20	25.481	19413	971	247.331	39.51	1.98
Arrenurus conicus Piersig	River Krąpiel	Z/4	Z/4/1	03.09.10	September	1	4		5	5	spring	helocrene	2.5	6.6	10.1	183.2	0.357	0.42	0.21	0.3	21.8	137	1	0	0.186047	1	2.32054	1.60891	2.35149	51.2067	5.01238	30.0124	2.9703	4.51733	63.3107	36.6893	1.98667	1.38182	78.49	3.92	7.77	1.06	20	25.481	19413	971	247.331	39.51	1.98
Lebertia glabra Thor	River Krąpiel	Z/4	Z/4/1	03.09.10	September	1			1	1	spring	helocrene	2.5	6.6	10.1	183.2	0.357	0.42	0.21	0.3	21.8	137	1	0	0.186047	1	2.32054	1.60891	2.35149	51.2067	5.01238	30.0124	2.9703	4.51733	63.3107	36.6893	1.98667	1.38182	78.49	3.92	7.77	1.06	20	25.481	19413	971	247.331	39.51	1.98
Tiphys sp. Koch	River Krąpiel	Z/4	Z/4/1	03.09.10	September			1	0	1	spring	helocrene	2.5	6.6	10.1	183.2	0.357	0.42	0.21	0.3	21.8	137	1	0	0.186047	1	2.32054	1.60891	2.35149	51.2067	5.01238	30.0124	2.9703	4.51733	63.3107	36.6893	1.98667	1.38182	78.49	3.92	7.77	1.06	20	25.481	19413	971	247.331	39.51	1.98
Arrenurus pugionifer Koenike	River Krąpiel	Z/6	Z/6/4	03.09.10	September	2			2	2	spring	limnocrene	5.3	7.89	12.3	486	0.283	0.43	0.083	0.4	13.7	110	4.8	0	3.18696	5	6.88623	1.76118	1.62029	17.5942	3.61043	52.6066	11.1483	4.77281	35.1686	64.8314	2.65333	1.1303	78.54	2.12	5.17	0.59	37	47.1098	25894	700	329.692	70.01	1.89
Arrenurus mediorotundatus Thor	River Krąpiel	Z/6	Z/6/4	03.09.10	September				0	0	spring	limnocrene	5.3	7.89	12.3	486	0.283	0.43	0.083	0.4	13.7	110	4.8	0	3.18696	5	6.88623	1.76118	1.62029	17.5942	3.61043	52.6066	11.1483	4.77281	35.1686	64.8314	2.65333	1.1303	78.54	2.12	5.17	0.59	37	47.1098	25894	700	329.692	70.01	1.89
Tiphys sp. Koch	River Krąpiel	Z/6	Z/6/4	03.09.10	September			1	0	1	spring	limnocrene	5.3	7.89	12.3	486	0.283	0.43	0.083	0.4	13.7	110	4.8	0	3.18696	5	6.88623	1.76118	1.62029	17.5942	3.61043	52.6066	11.1483	4.77281	35.1686	64.8314	2.65333	1.1303	78.54	2.12	5.17	0.59	37	47.1098	25894	700	329.692	70.01	1.89
Arrenurus conicus Piersig	River Krąpiel	Z/2	Z/2/3	19.05.10	May	1			1	1	spring	helocrene	7.3	7.1	10.7	140.9	0.2	0.5	0.5	0.15	60	58	4.8	0	31.4552	1	5.17957	2.51649	2.68752	40.4838	7.25629	27.1928	5.03298	9.65062	43.4213	56.5787	1.98667	1.51818	78.49	3.42	4.94	1.25	23	29.3031	28969	1260	369.079	60.33	2.62
Sperchon thienemanni Koenike	River Krąpiel	Z/3	Z/3/3	02.09.10	September		1		1	1	spring	reocrene		9.4	6.72	14.6	153.7	0.228	24.39	0.01	0.02	41	150	6.3	0.0034	36.8421	0	0.496139	0.637424	0.956136	57.355	13.6948	24.255	1.73484	0.870708	1.13339	98.8666	1.98667	0.80303	78.49	4.91	7.34	0.61	22	28.029	18905	1182	240.859	32.45
Lebertia salebrosa Koenike	River Krąpiel	Z/3	Z/3/3	02.09.10	September		1		1	1	spring	reocrene		9.4	6.72	14.6	153.7	0.228	24.39	0.01	0.02	41	150	6.3	0.0034	36.8421	0	0.496139	0.637424	0.956136	57.355	13.6948	24.255	1.73484	0.870708	1.13339	98.8666	1.98667	0.80303	78.49	4.91	7.34	0.61	22	28.029	18905	1182	240.859	32.45
Arrenurus mediorotundatus Thor	River Krąpiel	Z/6	Z/6/1	21.05.10	May		1		1	1	spring	helocrene	1.8	6.57	14.9	235	3.1	0.1	2.148	1	102	202	1.7	0	24.7949	2	12.5026	0.403309	8.66308	4.03309	411.375	814.685	6.85626	0	46.6892	53.3108	2.26667	1.67667	78.54	2.12	5.17	0.59	37	47.1098	25894	700	329.692	70.01	1.89
Sperchon sp.Kramer	River Krąpiel	Z/2	Z/2/1	11.07.10	July			1	0	1	spring	reocrene	4.5	6.96	20.5	171.5	0.724	1.26	0.299	0.02	14.06	298	2.3	0.0084	4.92063	0	0	0	0.811085	36.5664	11.4566	40.6218	5.57621	4.96789	35.474	64.526	2.12667	0.930303	78.49	3.42	4.94	1.25	23	29.3031	28969	1260	369.079	60.33	2.62
Hydrachna crassipalpis Piersig	River Krąpiel	Z/1	Z/1/2	19.05.10	May	1	2		3	3	spring	limnocrene	2.9	7.04	10.5	173.4	0.3	9.5	0.2	0.1	44.8	61	0.5	0	19.2674	2	7.79102	3.66636	2.92545	16.2695	4.76627	39.6502	16.5826	8.34861	9.99146	90.0085	2.05333	2.0003	78.54	1.428	2.76	0.52	55	70.028	37176	676	473.338	107.1	1.95
Hydrachna leegei Koenike	River Krąpiel	Z/1	Z/1/2	19.05.10	May	1	1		2	2	spring	limnocrene	2.9	7.04	10.5	173.4	0.3	9.5	0.2	0.1	44.8	61	0.5	0	19.2674	2	7.79102	3.66636	2.92545	16.2695	4.76627	39.6502	16.5826	8.34861	9.99146	90.0085	2.05333	2.0003	78.54	1.428	2.76	0.52	55	70.028	37176	676	473.338	107.1	1.95
Eylais hamata Koenike	River Krąpiel	Z/3	Z/3/4	20.05.10	May	1			1	1	spring	helocrene		5.8	7.8	12.7	147	0.167	7.03	0.01	0.21	6.6	228	2.2	0	26.6892	2	2.28022	1.37363	1.66209	32.4313	6.07143	45.1099	7.11538	3.95604	15.8938	84.1062	2.65333	1.38182	78.49	4.91	7.34	0.61	22	28.029	18905	1182	240.859	32.45
Sperchon thienemanni Koenike	River Krąpiel	Z/3	Z/3/3	04.11.10	November		1		1	1	spring	reocrene		5.7	5.3	13.4	211	0.079	8.82	0.01	0.05	17.2	151	5	0.0027	36.8421	0	7.70845	3.84486	4.03598	55.4769	9.82574	18.0026	0.805696	0.299794	12.2043	87.7957	1.10667	1.66303	78.49	4.91	7.34	0.61	22	28.029	18905	1182	240.859	32.45
Lebertia sp. Neuman	River Krąpiel	Z/4	Z/4/1	03.09.10	September			1	0	1	spring	helocrene	2.5	6.6	10.1	183.2	0.357	0.42	0.21	0.3	21.8	137	1	0	0.186047	1	2.32054	1.60891	2.35149	51.2067	5.01238	30.0124	2.9703	4.51733	63.3107	36.6893	1.98667	1.38182	78.49	3.92	7.77	1.06	20	25.481	19413	971	247.331	39.51	1.98
Hygrobates norvegicus (Thor)	River Krąpiel	Z/2	Z/2/1	02.09.10	September	1			1	1	spring	reocrene	5.6	5.2	10.8	166	0.285	0.61	0.156	0.03	0	112	3.6	0.2743	5.70513	0	0	0	0.811085	36.5664	11.4566	40.6218	5.57621	4.96789	35.474	64.526	2.12667	0.930303	78.49	3.42	4.94	1.25	23	29.3031	28969	1260	369.079	60.33	2.62
Sperchon thienemanni Koenike	River Krąpiel	Z/2	Z/2/1	02.09.10	September	1			1	1	spring	reocrene	5.6	5.2	10.8	166	0.285	0.61	0.156	0.03	0	112	3.6	0.2743	5.70513	0	0	0	0.811085	36.5664	11.4566	40.6218	5.57621	4.96789	35.474	64.526	2.12667	0.930303	78.49	3.42	4.94	1.25	23	29.3031	28969	1260	369.079	60.33	2.62
Arrenurus sp. Duges	River Krąpiel	Z/4	Z/4/1	03.09.10	September			1	0	1	spring	helocrene	2.5	6.6	10.1	183.2	0.357	0.42	0.21	0.3	21.8	137	1	0	0.186047	1	2.32054	1.60891	2.35149	51.2067	5.01238	30.0124	2.9703	4.51733	63.3107	36.6893	1.98667	1.38182	78.49	3.92	7.77	1.06	20	25.481	19413	971	247.331	39.51	1.98
Sperchon sp.Kramer	River Krąpiel	Z/2	Z/2/1	12.07.10	July			1	0	1	spring	reocrene	4.5	6.96	20.5	171.5	0.724	1.26	0.299	0.02	14.06	298	2.3	0.0084	4.92063	0	0	0	0.811085	36.5664	11.4566	40.6218	5.57621	4.96789	35.474	64.526	2.12667	0.930303	78.49	3.42	4.94	1.25	23	29.3031	28969	1260	369.079	60.33	2.62
Piona nodata laminata (Thor)	River Krąpiel	Z/1	Z/1/2	19.05.10	May		3		3	3	spring	limnocrene	2.9	7.04	10.5	173.4	0.3	9.5	0.2	0.1	44.8	61	0.5	0	19.2674	2	7.79102	3.66636	2.92545	16.2695	4.76627	39.6502	16.5826	8.34861	9.99146	90.0085	2.05333	2.0003	78.54	1.428	2.76	0.52	55	70.028	37176	676	473.338	107.1	1.95
Tiphys latipes (O.F. Müller)	River Krąpiel	Z/1	Z/1/2	19.05.10	May		2		2	2	spring	limnocrene	2.9	7.04	10.5	173.4	0.3	9.5	0.2	0.1	44.8	61	0.5	0	19.2674	2	7.79102	3.66636	2.92545	16.2695	4.76627	39.6502	16.5826	8.34861	9.99146	90.0085	2.05333	2.0003	78.54	1.428	2.76	0.52	55	70.028	37176	676	473.338	107.1	1.95
[truncated: 426 more columns]
